# Supplementary material for: An unnatural amino acid that mimics phosphotyrosine
Source: Royal Society of Chemistry journal article supplement (doi:10.1039/c000283f), 2010-01-01

## **Supporting Information**

### **An Unnatural Amino Acid That Mimics Phosphotyrosine**

Jingyan Ge<sup>a</sup>, Hao Wu<sup>a</sup> and Shao Q. Yao<sup>\*a,b,c</sup>

*Departments of<sup>a</sup>Chemistry and<sup>b</sup>Biological Sciences, <sup>c</sup>NUS MedChem Program of the Life Sciences Institute, National University of Singapore, 3 Science Drive 3, Singapore 117543, Republic of Singapore*

*\*Corresponding author (chmyaosq@nus.edu.sg)*

### **Contents**

- 1. General information**
- 2. Synthetic procedures for the unnatural amino acid**
- 3. Procedure and LC-MS profiles of inhibitors and SH2-binding peptide**
- 4. Procedures and results of cell proliferation**
- 5. Procedure and results of fluorescence polarization (FP) experiments**
- 6. Procedure and results of docking simulations**
- 7. Procedure and results of hydrolytic stability test**
- 8. Procedure and results of cell permeability test**
- 9. References**
- 10. <sup>1</sup>H and <sup>13</sup>C NMR spectra**

## 1. General Information

All chemicals were purchased from commercial vendors and used without further purifications, unless otherwise noted.  $^1\text{H}$  NMR spectra and  $^{13}\text{C}$  NMR were recorded on Bruker 300 MHz, 500 MHz or DPX-300 NMR spectrometers. Chemical shifts are reported in parts per million referenced with respect to residual solvent ( $\text{CDCl}_3 = 7.26$  ppm and  $\text{DMSO-}d_6 = 2.5$  ppm) or from internal standard tetramethylsilane (TMS = 0.00 ppm). The following abbreviation was used in reporting spectra: s = singlet, d = doublet, t = triplet, q = quarter, m = multiplet, dd = doublet of doublets. High resolution mass spectra (HRMS) were recorded on Finnigan MAT95XL-T using ESI. All solvents used were of HPLC grade, unless otherwise indicated. All reactions requiring anhydrous conditions were conducted under a nitrogen or argon atmosphere in flame-dried glasswares. Dimethylformamide was dried over calcium hydride and distilled under reduced pressure. All LC profiles and mass spectra were recorded on Shimadzu LC-IT-TOF and LC-ESI systems equipped with an autosampler, using reverse-phase Phenomenex Luna 5  $\text{C}_{18}$  (2)  $100 \text{ \AA} \times 50 \times 3.0$  mm column. Proteins were expressed in *E. coli* strain BL21-DE3 and purified by Ni-NTA technology.  $\text{IC}_{50}$  curves were generated using the Graphpad Prism software v. 5 (GraphPad, San Diego, USA).

## 2. Synthetic procedures for the unnatural amino acid

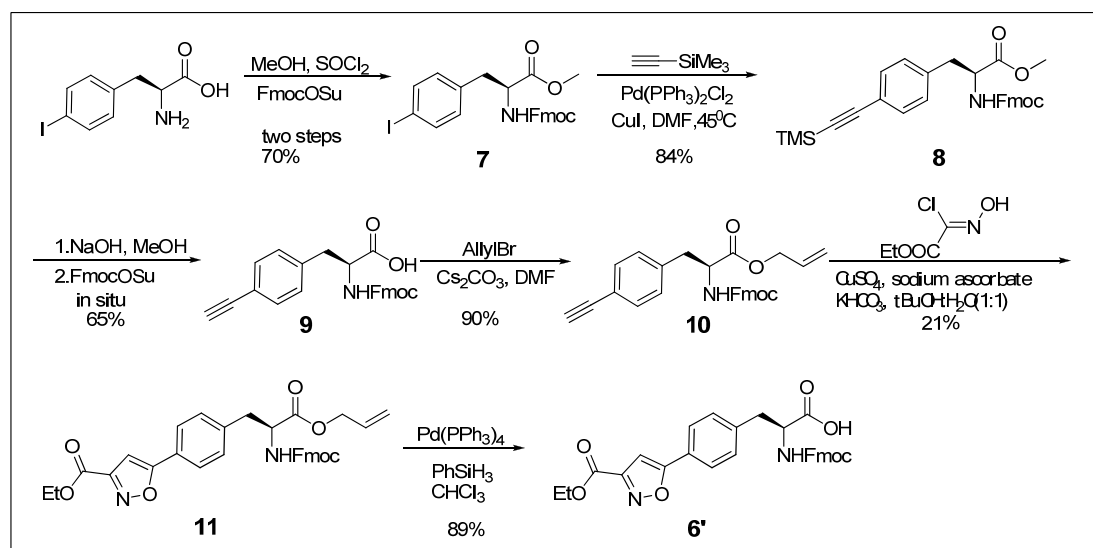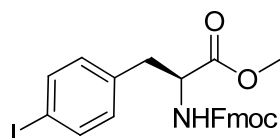

### Methyl 2-(((9H-fluoren-9-yl)methoxy)carbonylamino)-3-(4-iodophenyl)propanoate (7)

Thionyl Chloride (15 mL) was added dropwise to 4-Iodo-*L*-phenylalanine (12 g, 41.3 mmol, synthesized following reference 1) <sup>[1]</sup> in a methanol (200 mL) solution at  $0^\circ\text{C}$ .

The yellow solution was refluxed for 2 hours. The solution was evaporated and dissolved in a minimal amount of hot MeOH. Et<sub>2</sub>O was added to obtain the white product precipitation. The crude product was dissolved in NaHCO<sub>3</sub> (sat.) and dichloromethane (DCM) (20 mL each). To this solution was added Fmoc-OSu (15.2 g, 45.4 mmol), followed by stirring for 5 hours. DCM was evaporated *in vacuo*. The residue was extracted with EtOAc three times. The organic layer was combined, washed with brine and dried over Na<sub>2</sub>SO<sub>4</sub>. Flash column chromatography (9/1 to 3/1 Hexane/EtOAc gradients) afforded the protected unnatural amino acid **7** as a white solid (15.2 g, 70 % in two steps). <sup>1</sup>H-NMR (300 MHz, CDCl<sub>3</sub>) δ 7.78 (d, *J* = 7.38 Hz, 2H), 7.55-7.61 (m, 4H), 7.41 (t, *J* = 7.40 Hz, 2H), 7.32 (t, *J* = 7.39 Hz, 2H), 6.81 (d, *J* = 7.89 Hz, 2H), 5.23 (d, *J* = 8.22 Hz, NH), 4.63-4.65 (1H, m), 4.34-4.50 (2H, m), 4.20 (t, *J* = 6.42 Hz, 1H), 3.73 (s, 3H), 2.98-3.08 (m, 2H). <sup>13</sup>C-NMR (75 MHz, CDCl<sub>3</sub>) δ 171.6, 155.5, 143.6, 141.3, 137.6, 135.4, 131.2, 127.7, 127.1, 125.0, 120.0, 92.6, 66.8, 54.5, 52.4, 47.14, 37.7. IT-TOF: *m/z* [M+H]<sup>+</sup> calcd: 528.06, found: 528.03.

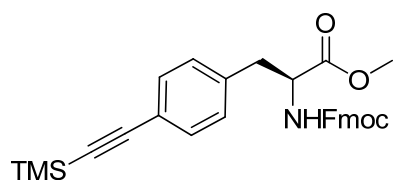

**Methyl 2-(((9H-fluoren-9-yl)methoxy)carbonylamino)-3-(4-((trimethylsilyl)ethynyl) phenyl)propanoate (**8**)**

DMF (25 mL) was degassed by bubbling with argon in a dry two-neck round bottle flask. Subsequently, compound **7** (1.2 g, 2.28 mmol) was added and the solution was stirred until it became homogenous. Pd(PPh<sub>3</sub>)<sub>2</sub>Cl<sub>2</sub> (16 mg, 0.02 mmol) and CuI (18.9 mg, 0.1 mmol), DIEA (1.2 mL, 6.5 mmol) were subsequently added under an N<sub>2</sub> atmosphere. Trimethylsilyl acetylene (0.63 mL, 4.56 mmol) was then added by a needled syringe. The reaction was heated at 45 °C for 3 hours before being quenched by addition of an ammonium chloride solution and EtOAc. Then the aqueous phase was extracted with EtOAc. The combined organic phases were washed with brine and dried with Na<sub>2</sub>SO<sub>4</sub>. After removal of the solvent under reduced pressure, column chromatography on silica gel (1/9 to 1/6 EtOAc/Hexane gradients) afforded **8** as a light yellow solid (84 % yield). <sup>1</sup>H-NMR (300 MHz, CDCl<sub>3</sub>) δ 7.75 (d, *J* = 7.38 Hz, 2H), 7.53-7.55 (broad, 2H), 7.27-7.41 (m, 6H), 7.01 (d, *J* = 7.71 Hz, 2H), 5.27 (d, *J* = 8.04 Hz, NH), 4.64 (m, 1H), 4.35-4.46 (m, 2H), 4.19 (t, *J* = 6.66 Hz, 1H), 3.69 (s, 3H), 3.05-3.10 (m, 2H), 0.25 (s, 9H). <sup>13</sup>C-NMR (75 MHz, CDCl<sub>3</sub>) δ 171.6, 155.4, 143.7, 141.3, 136.3, 132.1, 129.1, 127.7, 127.0, 125.0, 121.9, 120.0, 104.7, 94.4, 66.9, 54.6, 52.3, 47.1, 38.1, -0.1. IT-TOF: *m/z* [M+Na]<sup>+</sup> calcd: 520.20, found: 520.17.

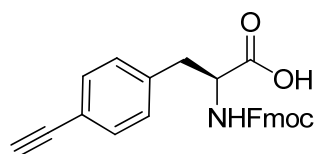

**2-(((9H-fluoren-9-yl)methoxy)carbonylamino)-3-(4-ethynylphenyl)propanoic acid (**9**)**

The compound **8** (2.0 g, 4 mmol) was dissolved in MeOH (10 mL) and cooled to 0 °C. NaOH (10 mL, 10 M) was added dropwise. After 5 hours, the pH of the solution was adjusted to 8 using HCl and NaHCO<sub>3</sub> (sat). Then to the mixture was added Fmoc-OSu (1.6 g, 4.8 mmol) followed by stirring overnight. MeOH was removed *in vacuo* and the aqueous layer was extracted with EtOAc. The combined organic phases were washed with brine and dried with Na<sub>2</sub>SO<sub>4</sub>. After removal of the solvent under reduced pressure, column chromatography on silica gel (9/1 Hexane/EtOAc to 9/1 EtOAc/MeOH with 0.1 % acetic acid gradients) afforded **9** (1.07 g, 65 %) as a white solid. <sup>1</sup>H-NMR (300 MHz, CD<sub>3</sub>OD) δ 7.78 (d, *J* = 7.38 Hz, 2H), 7.57 (d, *J* = 7.41 Hz, 2H), 7.38 (t, *J* = 7.56 Hz, 4H), 7.26-7.31 (m, 2H), 7.11 (d, *J* = 8.04 Hz, 2H), 4.13-4.41 (m, 4H), 3.42 (s, 1H), 2.90-3.24 (m, 2H). <sup>13</sup>C-NMR (75 MHz, DMSO-*d*<sub>6</sub>) δ 174.8, 158.3, 145.2, 142.5, 139.6, 133.0, 128.7, 128.1, 126.1, 122.1, 120.9, 84.3, 78.5, 67.9, 56.5, 48.3, 38.3, 26.3. IT-TOF: *m/z* [M+Na]<sup>+</sup> calcd: 434.15, found: 434.12.

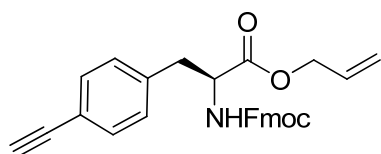

**Allyl 2-(((9H-fluoren-9-yl)methoxy)carbonylamino)-3-(4-ethynylphenyl)propanoate (10)**

The compound **9** (0.75 g, 1.8 mmol) was dissolved in MeOH (10 mL). Cs<sub>2</sub>CO<sub>3</sub> (0.28 g, 0.85 mmol) was added over a period of 10 min. Subsequently, MeOH was removed *in vacuo*. The residue was redissolved in DMF (20 mL). Allyl bromide (0.68 g, 5.6 mmol) was added. After 1 hour, DMF was distilled off under reduced pressure. Water was added and the solution was extracted with EtOAc. The combined organic phase was washed with brine, dried over Na<sub>2</sub>SO<sub>4</sub> and concentrated. The crude product was purified by silica gel chromatography (EtOAc/Hexane gradients). The white product **10** was obtained in 90 % yield. <sup>1</sup>H-NMR (300 MHz, CDCl<sub>3</sub>) δ 7.78 (d, *J* = 7.41 Hz, 2H), 7.57 (d, *J* = 7.23 Hz, 2H), 7.39-7.43 (m, 4H), 7.32-7.34 (t, *J* = 7.40 Hz, 2H), 7.06 (d, *J* = 7.86 Hz, 2H), 5.83-5.88 (m, 1H), 5.26-5.35 (m, 3H), 4.61-4.72 (m, 3H), 4.35-4.50 (m, 2H), 4.21 (t, *J* = 6.82 Hz, 1H), 3.08-3.15 (m, 3H). <sup>13</sup>C-NMR (75 MHz, CDCl<sub>3</sub>) δ 170.9, 155.5, 143.8, 141.3, 136.6, 132.3, 131.2, 129.4, 127.7, 127.0, 125.0, 121.0, 120.0, 119.3, 77.3, 83.3, 66.9, 66.2, 54.6, 47.2, 38.1. IT-TOF: *m/z* [M+Na]<sup>+</sup> calcd: 474.18, found: 474.15.

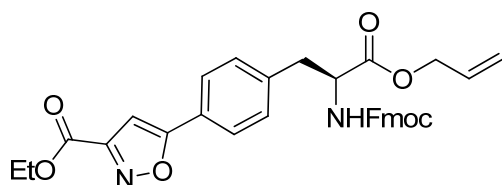

**Ethyl 5-(4-(2-(((9H-fluoren-9-yl)methoxy)carbonylamino)-3-(allyloxy)-3-oxo-propyl)phenyl)isoxazole-3-carboxylate (11)** <sup>[2]</sup>

Method 1: Compound **10** (0.1 g, 0.22 mmol) and ethyl chlorooximidoacetate (33 mg, 0.22 mmol) were dissolved in *t*-BuOH (5 mL). To the resulting solution, H<sub>2</sub>O was

added, followed by sodium ascorbate (4.35 mg, 0.02 mmol), copper sulfate (2.75 mg, 0.01 mmol) and finally  $\text{KHCO}_3$  (90 mg, 0.9 mmol). The reaction mixture was stirred at room temperature for 24 hours. Upon evaporation of *t*-BuOH, the reaction was extracted several times with EtOAc. The organic layers were then collected, dried over anhydrous  $\text{Na}_2\text{SO}_4$  and filtered, and then the solvent was removed under reduced pressure to yield a crude product. The product was purified by flash chromatography to yield **11** (21 %) as a white solid.

Method 2: Compound **10** (0.5 g 1.1 mmol) and ethyl chlorooximidoacetate (0.25 g, 1.6 mmol) were dissolved in THF (20 mL). Triethylamine (0.22 g, 2.2 mmol) was slowly added into solution. The mixture was stirred for 1 day. THF and TEA was evaporated and the residue redissolved in EtOAc. After washing with brine and drying over  $\text{Na}_2\text{SO}_4$ , the organic layer was evaporated. The crude product was purified by flash chromatography to obtain **11** (15%).

$^1\text{H-NMR}$  (500 MHz,  $\text{CDCl}_3$ )  $\delta$  7.77 (d,  $J = 7.60$  Hz, 2H), 7.70 (d,  $J = 7.60$  Hz, 2H), 7.55-7.57 (m, 2H), 7.40 (t,  $J = 7.40$  Hz, 2H), 7.30 (t,  $J = 7.55$  Hz, 2H), 7.21 (d,  $J = 8.20$  Hz, 2H), 5.85-5.91 (m, 1H), 5.26-5.38 (m, 3H), 4.70-4.74 (m, 1H), 4.63 (d,  $J = 5.7$  Hz, 1H), 4.47 (q,  $J = 7.55$  Hz, 2H), 4.35-4.39 (m, 1H), 4.19 (t,  $J = 6.95$  Hz, 1H), 3.18 (dd,  $J = 13.87, 5.65$  Hz, 2H), 1.45 (t,  $J = 6.96$  Hz, 3H).  $^{13}\text{C-NMR}$  (125 MHz,  $\text{CDCl}_3$ )  $\delta$  171.1, 170.8, 159.9, 156.9, 155.5, 143.7, 141.3, 138.9, 131.1, 130.1, 127.7, 127.0, 126.0, 125.4, 125.0, 120.0, 119.4, 99.8, 66.8, 66.2, 62.2, 54.6, 47.1, 38.1, 14.1. IT-TOF:  $m/z$   $[\text{M}+\text{H}]^+$  calcd: 567.21, found: 567.20.

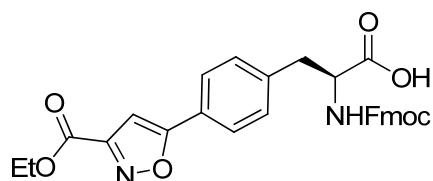

Chemical Formula:  $\text{C}_{30}\text{H}_{26}\text{N}_2\text{O}_7$

### 2-(((9H-fluoren-9-yl)methoxy)carbonylamino)-3-(4-(3-(ethoxycarbonyl)isoxazol-5-yl)phenyl)propanoic acid (**6'**)<sup>[3]</sup>

Compound **11** (20 mg, 0.03 mmol) was dissolved in DCM under an  $\text{N}_2$  atmosphere. Phenylsilane (8 mg, 0.07 mmol) and  $\text{Pd}(\text{PPh}_3)_4$  (1.7 mg, 1.5  $\mu\text{mol}$ ) were added. After 30 min, the solution became slightly dark and TLC was showed the reaction was finished. The solvent was removed under reduced pressure and the residue was directly purified by flash chromatography to obtain compound **6'** (89 %).  $^1\text{H-NMR}$  (300 MHz,  $\text{DMSO-}d_6$ )  $\delta$  13.1 (br, 1H), 7.86 (d,  $J = 7.23$  Hz, 4H), 7.61-7.68 (m, 3H), 7.37-7.45 (m, 5H), 7.25-7.31 (m, 2H), 4.39 (q,  $J = 6.9$  Hz, 2H), 4.17-4.19 (m, 4H), 2.91-3.19 (m, 2H), 1.35 (t,  $J = 7.05$  Hz, 3H).  $^{13}\text{C-NMR}$  (75 MHz,  $\text{DMSO-}d_6$ )  $\delta$  173.1, 171.1, 159.4, 156.8, 155.9, 143.7, 141.4, 140.7, 130.1, 127.6, 127.0, 125.7, 125.2, 124.3, 120.1, 100.4, 65.6, 61.2, 55.2, 46.5, 36.3, 14.0. HRMS calcd for  $\text{C}_{30}\text{H}_{25}\text{N}_2\text{O}_7$ : 525.1662, found: 525.1647.

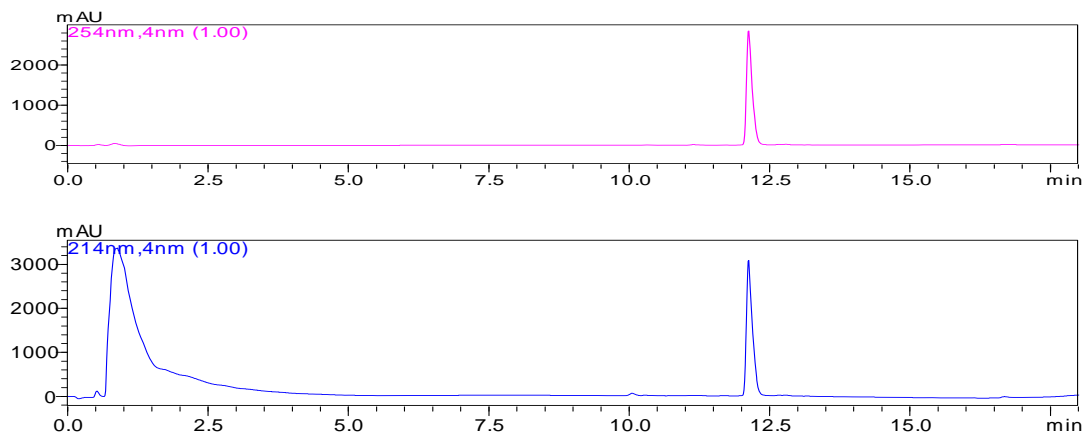

**Figure S1.** The analytical HPLC results of compound 6'

### 3. Procedure and LC-MS profiles of inhibitors and SH2-binding peptide

#### 3.1 Synthesis of inhibitors

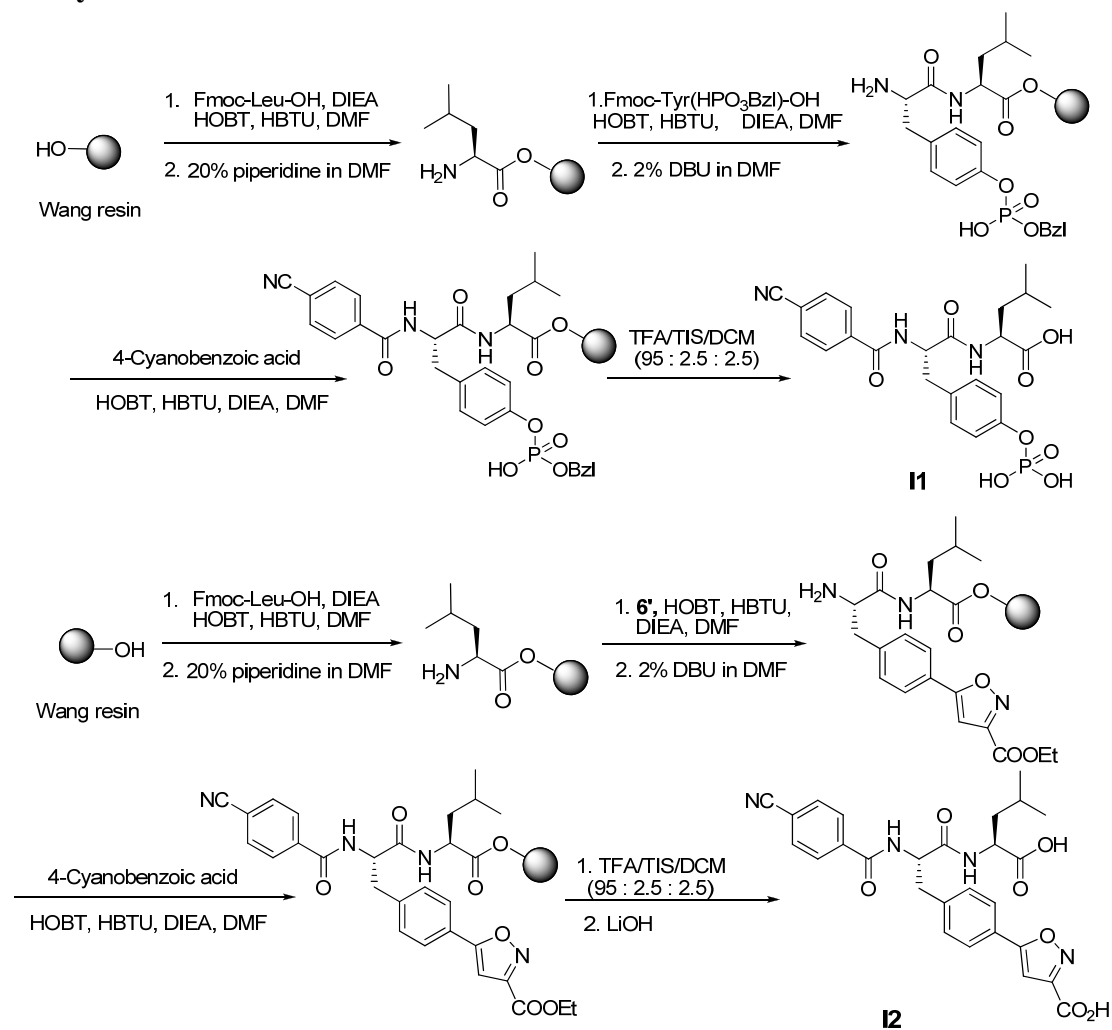

**Scheme S1:** Solid phase synthesis of two STAT3 PPI inhibitors.

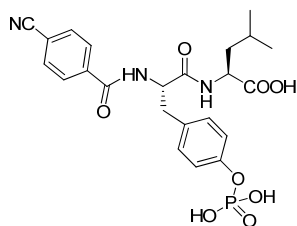

Exact Mass: 503.15

**Inhibitor II.** Wang resin was used to synthesize the inhibitors. First, Wang resin (100 mg, 0.05 mmol, and loading  $\sim$ 0.5 mmol/g) was previously swollen in DMF. Fmoc-Leu-OH (4 equiv) was pre-activated using HOBT (4 equiv), HBTU (4 equiv), DIEA (8 equiv) in DMF. And the resins were added into the solution. The reaction was shaken for 4 hours at room temperature. After that, the resin was washed with DMF (3 $\times$ ), DCM (3 $\times$ ) and DMF (3 $\times$ ). Next, Fmoc-protected amino functionalized resin was treated with 20% piperidine in DMF for 1 hour at room temperature. The resin was washed with DMF (3 $\times$ ), DCM (3 $\times$ ) and DMF (3 $\times$ ). Fmoc-Tyr (HPO<sub>3</sub>Bzl)-OH were pre-activated by HOBT (4 equiv), HBTU (4 equiv), DIEA (8 equiv) in DMF. The resin was added into the solution and shaken at room temperature overnight. Subsequently, the resin was washed with DMF (3 $\times$ ), DCM (3 $\times$ ) and DMF (3 $\times$ ). Deprotection of the Fmoc group was carried out with 2% DBU in DMF for 2 hours<sup>[4]</sup>. And the resin was washed again. 4-Cyanobenzoic acid was coupled with the resin using HOBT (4 equiv), HBTU (4 equiv), and DIEA (8 equiv) in DMF overnight. The resin was then washed with DCM and MeOH before being dried *in vacuo*. The cocktail cleavage solution contains TFA/TIS/DCM (95:2.5:2.5). The resin was treated with the cocktail for 2.5 hours, after which the resin was filtered off and the solvent was removed under reduced pressure. The resulting inhibitor was further purified by preparative HPLC.

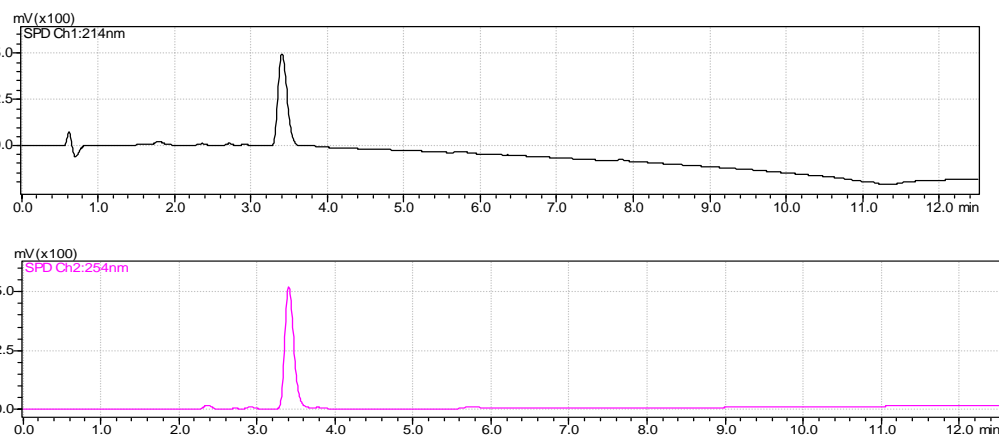

**Figure S2.** The LCMS results of compound **II**

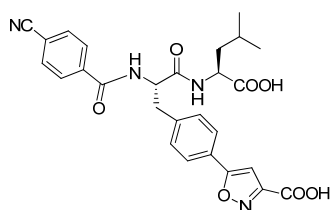

Chemical Formula: C<sub>27</sub>H<sub>26</sub>N<sub>4</sub>O<sub>7</sub>  
Exact Mass: 518.1801

Inhibitor **I2**. The inhibitor **I2** was synthesized similarly as **I1** following procedures as shown above. The unnatural amino acid, compound **6'**, was coupled to the resin as follows. First, **6'** was pre-activated by HOBT (4 equiv), HBTU (4 equiv), DIEA (8 equiv) in DMF. Then resin was added into the solution and the resulting mixture was shaken at room temperature overnight. Subsequently, the resin was washed with DMF (3×), DCM (3×) and DMF (3×). The deprotection of Fmoc group was carried on 2 % DBU in DMF for 2 hours<sup>[4]</sup>. And the resin was washed again. 4-Cyanobenzoic acid was coupled with the resin using HOBT (4 equiv), HBTU (4 equiv), and DIEA (8 equiv) in DMF overnight. The resin was washed, after coupling, with DMF (3×), DCM (3×) and DMF (3×). At the end of solid phase synthesis, the resin was washed with DCM and MeOH before being dried *in vacuo*. The inhibitor was cleaved off the resin by treatment with the cocktail mixture, TFA/TIS/DCM (95:2.5:2.5), for 2.5 hours. After that, the resin was filtered off and the solvent was removed under reduced pressure to give the protected form of the final product (precursor). The final product was subsequently obtained by treating the precursor with LiOH (2 M) in THF for 2 hours followed by purification with preparative HPLC. <sup>1</sup>H-NMR (500 MHz, DMSO-*d*<sub>6</sub>) δ 8.90 (d, *J* = 8.85 Hz, 1H), 8.42 (d, *J* = 8.20 Hz, 1H), 7.90-7.92 (m, 4H), 7.84 (d, *J* = 8.20 Hz, 1H), 7.54 (d, *J* = 8.85 Hz, 2H), 7.34 (s, 1H), 4.81-4.84 (m, 1H), 4.25-4.29 (m, 1H), 3.01-3.25 (m, 2H), 1.60-1.69 (m, 1H), 1.53-1.59 (m, 2H), 0.89 (dd, *J* = 14.80, 6.30 Hz, 6H) <sup>13</sup>C-NMR (125 MHz, DMSO-*d*<sub>6</sub>) δ 173.9, 171.0, 164.9, 160.8, 157.7, 141.4, 139.5, 137.9, 132.3, 130.0, 128.2, 125.6, 124.4, 118.3, 113.7, 100.4, 53.4, 50.4, 36.9, 24.3, 22.8, 21.3. HRMS calcd C<sub>27</sub>H<sub>25</sub>N<sub>4</sub>O<sub>7</sub>: *m/z* [M+H]<sup>+</sup> calcd: 517.1724, found: 517.1721.

Based on the <sup>1</sup>H NMR result, we found no sign of racemization in the final product **I2**, indicating that during the synthesis of the new amino acid **6'** and the final inhibitor **I2**, the two steps where base treatments were involved (**8** to **9** in Scheme 1 and the LiOH treatment of the cleaved peptide giving **I2** in Scheme 2) did not cause noticeable racemization.

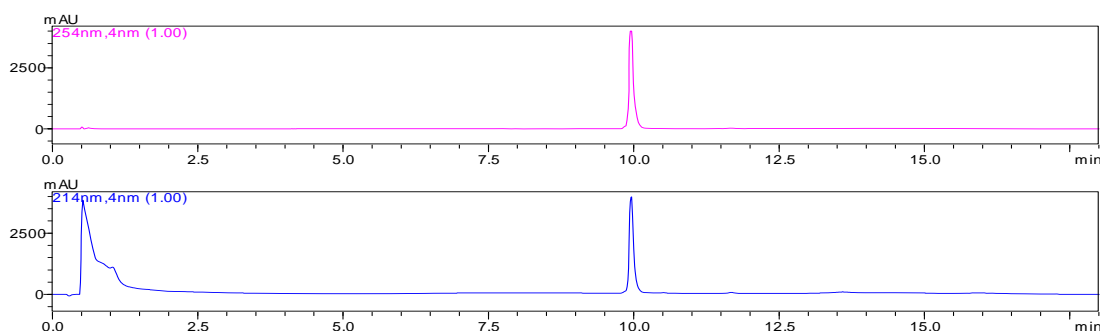

**Figure S3.** The analytical HPLC results of compound **I2**

### 3.2 Synthesis of SH2-binding peptide Fluorescein- GY\*LPQTV-NH<sub>2</sub>

Rink amide resin (100 mg, loading ~ 0.5 mmol/g) was first swollen in DMF and washed with DMF (2×). Before coupling, 20% piperidine in DMF was used to deprotect the Fmoc group for 1 h at RT. Subsequently, the resin was washed with several cycles of DMF and DCM. Fmoc-Val-OH (4 equiv) was pre-activated using HOBT (4 equiv), HBTU (4 equiv), DIEA (8 equiv) in DMF. The resin was put into the solution and shaken for 4 hours. Next, the resin was washed with several cycles of DMF and DCM and treated with 20% piperidine to remove the Fmoc group prior to the next coupling.



The cycle of coupling was repeated with Fmoc-Thr(OtBu)-OH, Fmoc-Gln(Trt)-OH, Fmoc-Pro-OH, Fmoc-Leu-OH, Fmoc-Tyr(HPO<sub>3</sub>Bzl)-OH, Fmoc-Gly-OH. Final, the resin was coupled with 3', 6'-diacetyl fluorescein (4 equiv). After washing, the acetyl protecting group was removed by treatment with 20% piperidine in DMF. Finally, the resin was washed with DMF (3×), DCM (3×) and MeOH (3×) and dried thoroughly under reduced pressure. A solution of cleavage solution TFA/TIS/DCM (95:2.5:2.5) was added to the resin for 2 hours. The resin was filtered off. The solvent was removed *in vacuo*. The peptide was purified by preparative HPLC.

#### 4. Procedures and results of cell proliferation

T47D cancer cell line was from the National Cancer Institute Developmental Therapeutics Program (NCI60 cell line panel). Cells were cultivated in a T25 flask in RPMI (Invitrogen, Carlsbad, CA) medium with 10% Fetal Bovine Serum (FBS, Gibco Invitrogen) and 100 U/mL Penicillin-Streptomycin (Thermo Scientific, Rockford, IL) and maintained in a humidified 37 °C incubator with 5 % CO<sub>2</sub>. Subsequently, trypsin with EDTA were used to detach cells from the flask. Cells were counted using Hemocytometer and seeded equally into each well of a 96-well plate. Each well contains around 3000~4000 cells in culture medium with 10% FBS. After overnight culture, the medium was aspirated and then treated with different concentrations of **I1** and **I2** in DMSO (500 μM, 250 μM, 125 μM). Staurosporine (STS) was used as a positive control. The same volume of DMSO (final concentration in each well is 0.56%) was used as a negative control. After 2 days, the tetrazolium salt XTT solution (0.2 mg/mL XTT, 25 M phenazine methosulfate (PMS), Roche) was added to the cells. After incubating at 37 °C for 20 hours, the absorbance was measured at 450 nm and background absorbance was measured at 650 nm using a Biotek™ plate reader. Data was presented as the following:

$$viability = \frac{A_{450nm} - A_{650nm}}{a_{450nm} - a_{650nm}}$$

A<sub>450nm</sub> and A<sub>650nm</sub> are the absorbance at 450 nm and the background absorbance at 650 nm of the sample wells; a<sub>450nm</sub> and a<sub>650nm</sub> are the absorbance at 450nm and the background absorbance at 650nm of the control wells (which only contained DMSO).

#### 5. Procedure and results of fluorescence polarization (FP) experiments

The clone containing the mammalian STAT3 SH2 domain was purchased from Open Biosystems (USA). The construct contains the SH2 domain cloned into a modified pET28 bacterial expression vector. A 6xHis tag is encoded for expression at the N-terminus which gives a final 68 KD fusion protein. The protein was expressed and purified according to protocols provided by the vendor.<sup>[5]</sup> Figure S1 shows the coomassie gel of fractions containing the purified protein (shown as a band at the expected 68KD position). Only sufficiently pure fractions were collected and used for

the following FP experiments. Fluorescence polarization (FP) experiments were carried out following published procedures.<sup>[6]</sup> Different concentrations of the inhibitor (1 mM - 7.8  $\mu$ M) were first incubated with the protein (150 nM) for 30 min. Subsequently, the fluorescently labeled STAT3 peptide (Fluorescein-GY\*LPQTV-NH<sub>2</sub>) was then added into each well (final conc: 10 nM). The fluorescence readings were then taken with a fluorescence plate reader (Tecan, USA) installed with 2 pairs of polarizers ( $\lambda_{\text{ex}}$ : 485  $\pm$  20 nm,  $\lambda_{\text{em}}$ : 520  $\pm$  10 nm). From the data, each IC<sub>50</sub> plot was generated by averaging the duplicates obtained from two independent assays.

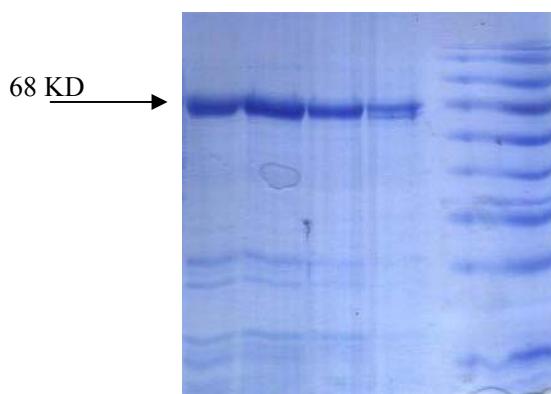

**Figure S4.** Representative coomassie gel of the purified STAT3 SH2 domain (From left to right, different elution fractions 1-4 and MW ladder). Only sufficiently pure fractions were pooled for subsequent FP experiments.

## 5.1 Procedure and results of inhibition assays of PTP1B

The inhibition of I2 to PTP1B was assayed by measuring the rate of hydrolysis of the fluorogenic substrate, 6,8-difluoromethylumbellifery phosphate (DIFMUP, Invitrogen, USA) in 25  $\mu$ L reaction volumes in black polypropylene flat-bottom 384-well microtiter plates (Greiner, Germany). Briefly, a two-fold dilution series of I2, from approximately 2 mM to 125  $\mu$ M (final concentrations) was prepared. PTP1B's concentration is the same as STAT3 SH2 domain, 150 nM. The substrate concentration is 25  $\mu$ M. The results are shown in Figure S5.

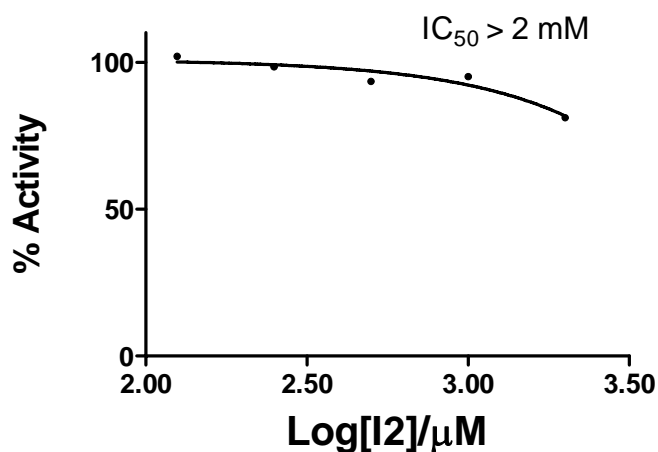

**Figure S5.** IC<sub>50</sub> graphs of I2 against PTP1B

## 6. Procedure and results of docking stimulations

Docking was carried out on an SGI IRIX 6.5 workstation using the SYBYL7.2 suite installed with the FlexX docking software. The mol2 format of the two inhibitors **I1** and **I2** was prepared by Sybyl v7.2 (Tripos, Missouri, USA). STAT3 were obtained from the Protein Data Bank, entry 1BG1<sup>[7]</sup>. The docking sphere was set at 10 Å and centered on the Arg 609 residue as binding site. The docking was performed for 100 iterations and Figure S6 shows the most preferred conformations.

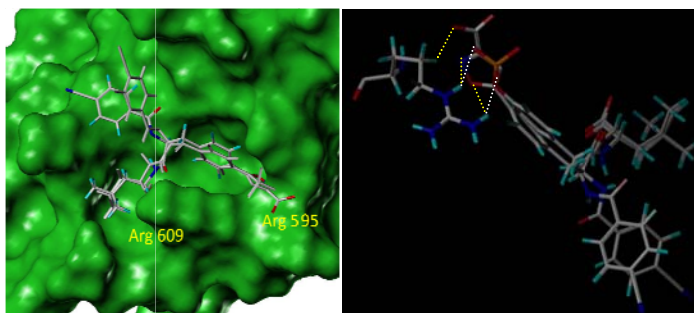

**Figure S6.** Left: Molecular docking of **I1** and **I2**. Right: shown the hydrogen bond between Arg595 and phosphate (**I1**, white dash bond), isoxazole carboxylic acid (**I2**, yellow dash) heads.

## 7. Procedure and results of hydrolytic stability test

First, T47D cell lysate was prepared in PBS, pH 7.5 by disrupting their cell membranes using needle and syringe. 1 µL of 5 mM **I1** and **I2** in DMSO was added into 100 µL 2 mg/mL cell lysate, respectively. After 15 hours, the lysate was pipetted into Ultracel YM-3 (Millipore) and centrifuge (13000 rpm, 50 min) to get the filtrate and remove most of proteins (larger than 3kD). Then, the composition of filtrate was analyzed by LCMS (Figure S7); **I1** was completely hydrolyzed in 15 h, while most of **I2** remained intact under the same conditions, indicating much more superior hydrolytic stability of **I2**.

a) untreated **I1**

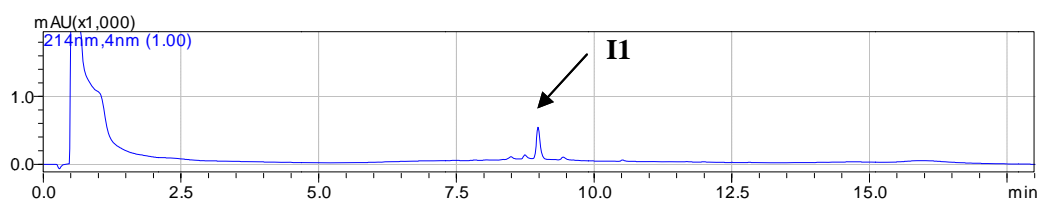

**I1** treated after 15 hrs

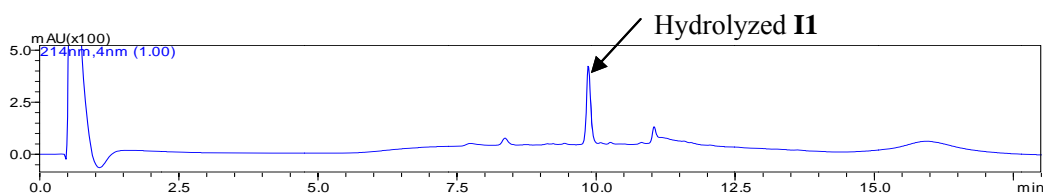

b) untreated **I2**

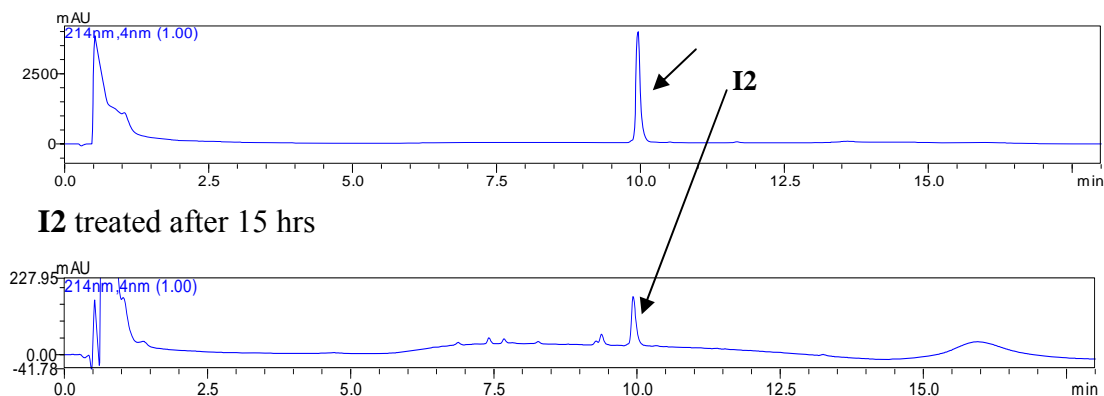

**Figure S7.** a) LC profiles of untreated (top) and treated I1 (bottom). b) LC profiles of untreated (top) and treated I2 (bottom).

## 8. Procedure and results of cell permeability test

MDCK (Madin-Darby canine kidney) cells were used for testing the cell permeability. MDCK was seeded with 600,000~700,000 cells per  $\text{cm}^2$  ( $0.11 \text{ cm}^2$  per well insert, Millipore® #PSHT004R1) and cultured for 3 days before test. When cultures are confluent, remove media and rinse inserts with Hanks' Balanced Salt Solution (HBSS, Gibco® #14025). Transport assay donor solutions consisted of  $50 \mu\text{M}$  I2 and caffeine in transport medium containing  $60 \mu\text{M}$  Lucifer Yellow (LY) and 1% DMSO. Transport assays were conducted using  $75 \mu\text{L}$  of apical (AP) donor solution and  $235 \mu\text{L}$  of basolateral (BL) acceptor solution (transport medium, pH 7.4, following manufacture descriptions of Millipore® #PSHT004R1). Monolayer was incubated with donor and acceptor solutions for 60 min at  $37 \text{ }^\circ\text{C}$ , 95% humidity. After 60 min, the donor and acceptor solutions of each compound are collected and quantified by HPLC. Lucifer Yellow (LY) was quantified using a fluorescence 96-well plate reader (BioTek® Synergy 4 fluorescence plate reader at  $\text{Ex} = 485 \text{ nm}$  and  $\text{Em} = 539 \text{ nm}$ ).  $P_{app}$  (apparent permeability) values were calculated according to the following equation:

$$P_{app} = \left( \frac{dQ}{dt} \right) \times \frac{1}{C_0} \times \frac{1}{A}$$

where  $dQ/dt$  is the permeability rate,  $C_0$  is the initial concentration in the donor compartment, and  $A$  is the surface area of the filter. Permeability rates were calculated by plotting the percent of initial AP drug mass (peak area) found in the BL compartment versus time and determining the slope of the line. Lucifer yellow (LY) results were used as an internal control for each monolayer to verify tight junction integrity during the entire assay period. Accordingly, LY  $P_{app}$  values were quantified from 60 min basolateral samples after background subtraction. As a quality control, results from MDCK monolayer with LY  $P_{app} > 30 \text{ nm/s}$  were not used. The results are shown in Table S1, indicating I2 is indeed reasonable cell-permeable.

**Table S1.** The results of cell permeability.

|                                           | Positive control | Negative control | <b>I2</b> |
|-------------------------------------------|------------------|------------------|-----------|
| Caffeine / 50 $\mu\text{M}$               | +                | -                | -         |
| Lucifer Yellow / 60 $\mu\text{M}$         | +                | +                | +         |
| Compound / 50 $\mu\text{M}$               | -                | -                | +         |
| DMSO                                      | 1%               | 1%               | 1%        |
| $P_{app}$ / $\text{nm}\cdot\text{s}^{-1}$ | 1217             | n.d.             | 876       |

n. d. : not determined.

## 10. References

- [1] Lei, H. Y.; Stoakers, M. S.; Herath, K. P. B.; Lee, J. H.; Schwabacher, A. W.; *J. Org. Chem.*, **1994**, *59*, 4206-4210
- [2] Soellner, M. B.; Rawls, K. A.; Grundner, C.; Alber, T.; Ellman, J. A.; *J. Am. Chem. Soc.*, **2007**, *129*, 9613-9615
- [3] Vazquez, M. E.; Blanco, J. B.; Imperiali, B.; *J. Am. Chem. Soc.*, **2005**, *127*, 1300-1306
- [4] Turkson, J.; Kim, J. S.; Zhang, S.; Yuan, J.; Huang, M.; Glenn, M.; Haura, E.; Sebt, S.; Hamilton, A.; Jove, R.; *Mol. Cancer Ther.*, **2004**, *3*, 261-269
- [5] (a) Lu, C. H. S.; Sun, H.; Bakar, F. B. A.; Uttamchandani, M.; Zhou, W.; Liou, Y.-C.; Yao, S. Q.; *Angew. Chem. Intl. Ed.*, **2008**, *47*, 7438-7441. (b) <http://www.openbiosystems.com>
- [6] Schust, J.; Berg, T.; *Anal. Biochem.*, **2004**, *330*, 114-118
- [7] (a) Becker, S.; Groner, B.; Muller, C. W. *Nature*, **1998**, *394*, 145-151. (b) Coleman, IV, D.R.; Ren, Z.; Mandal, P. K.; Cameron, A. G.; Dyer, G. A.; Muranjan, S.; Campell, M.; Chen, X. McMurray, J. S. *J. Med. Chem.*, **2005**, *48*, 6661-6670
- [8] Irvine, J. D.; Takahashi, L.; Lockhart, K.; Cheong, J.; Tolan, J. W.; Selick, H. E.; Grove, J. R. *J. Pharm. Sci.*, **1999**, *88*, 28-33

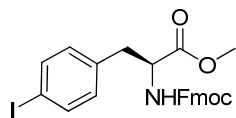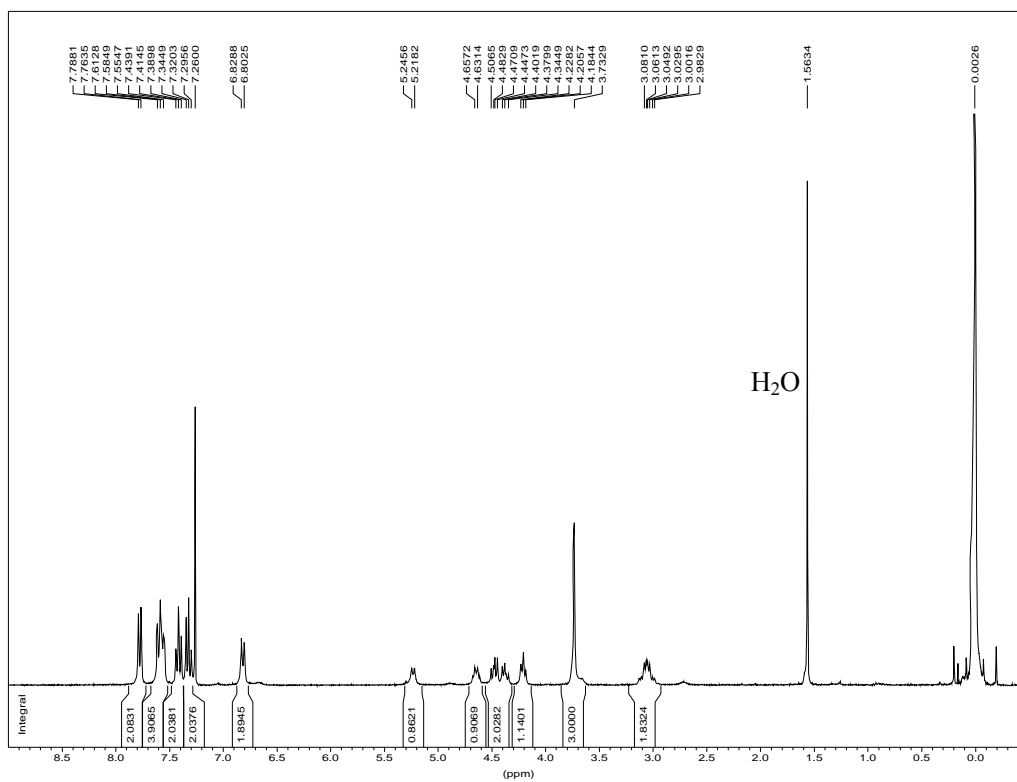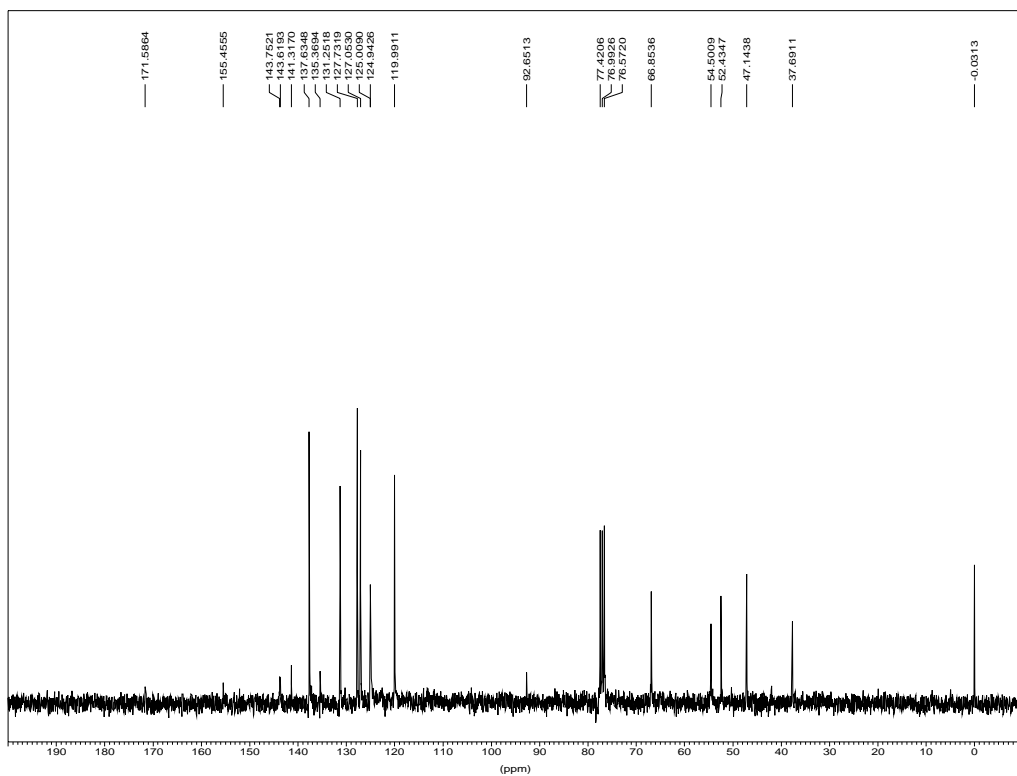

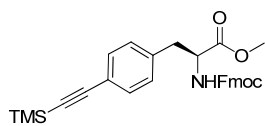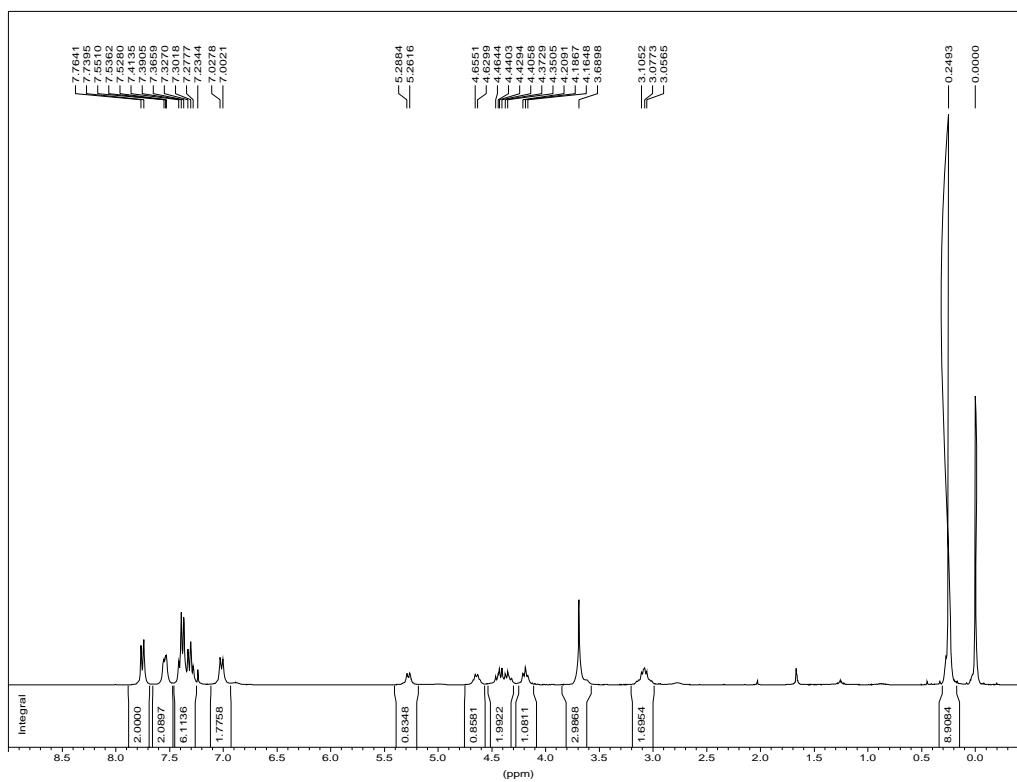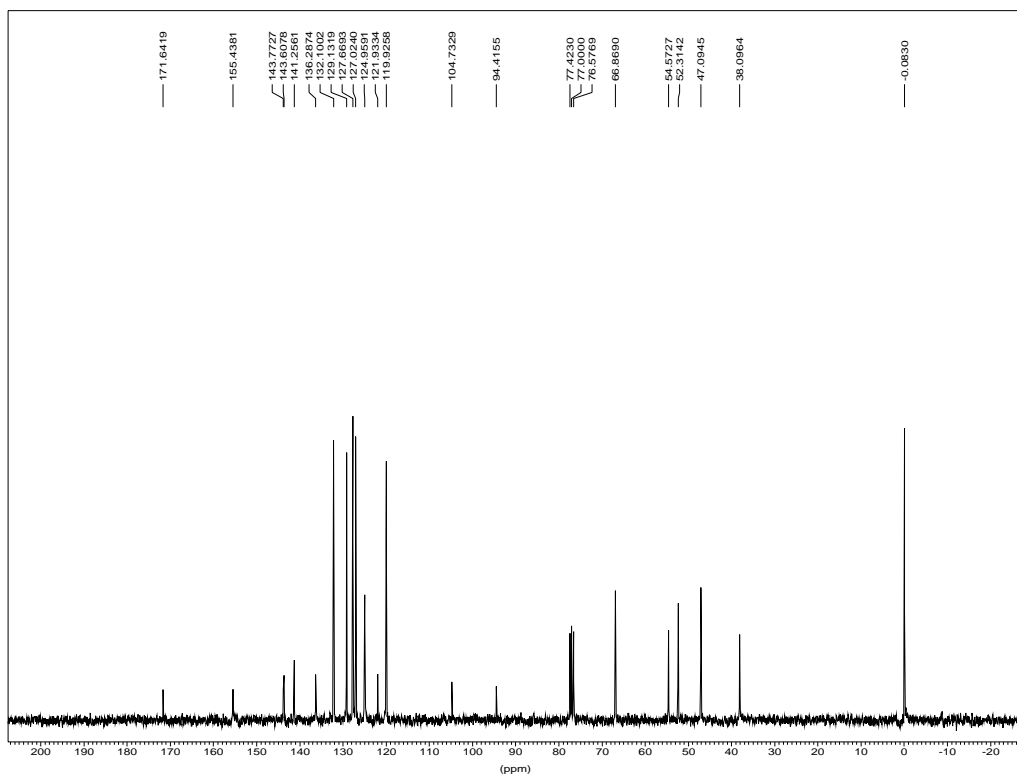



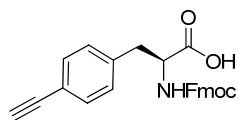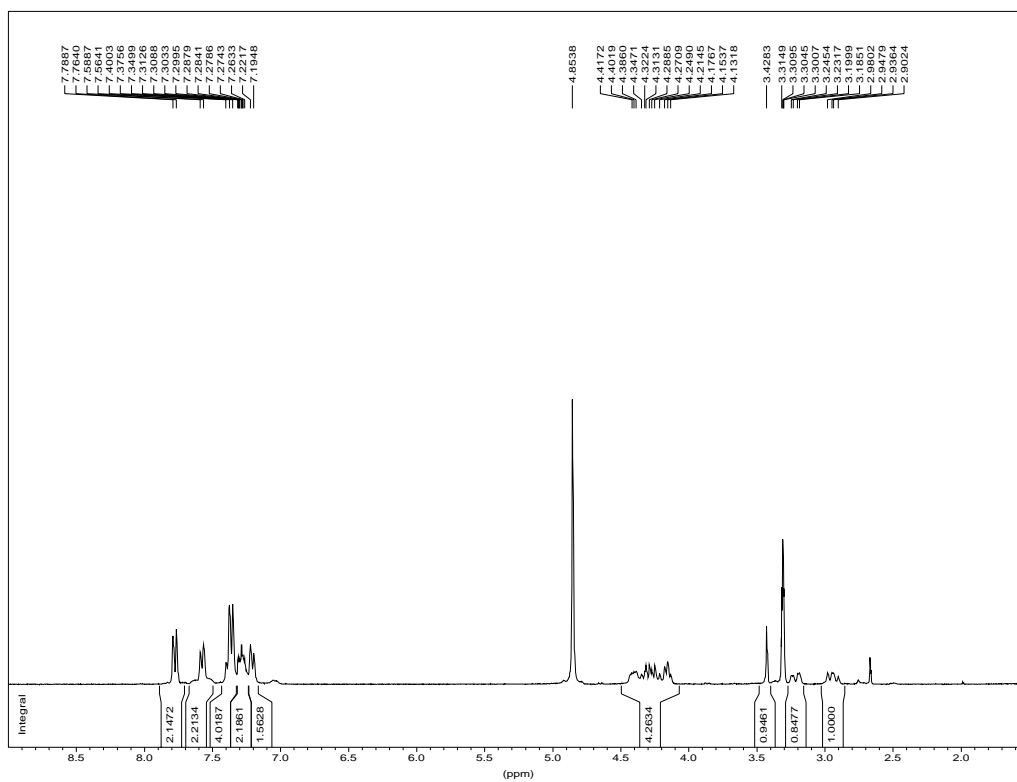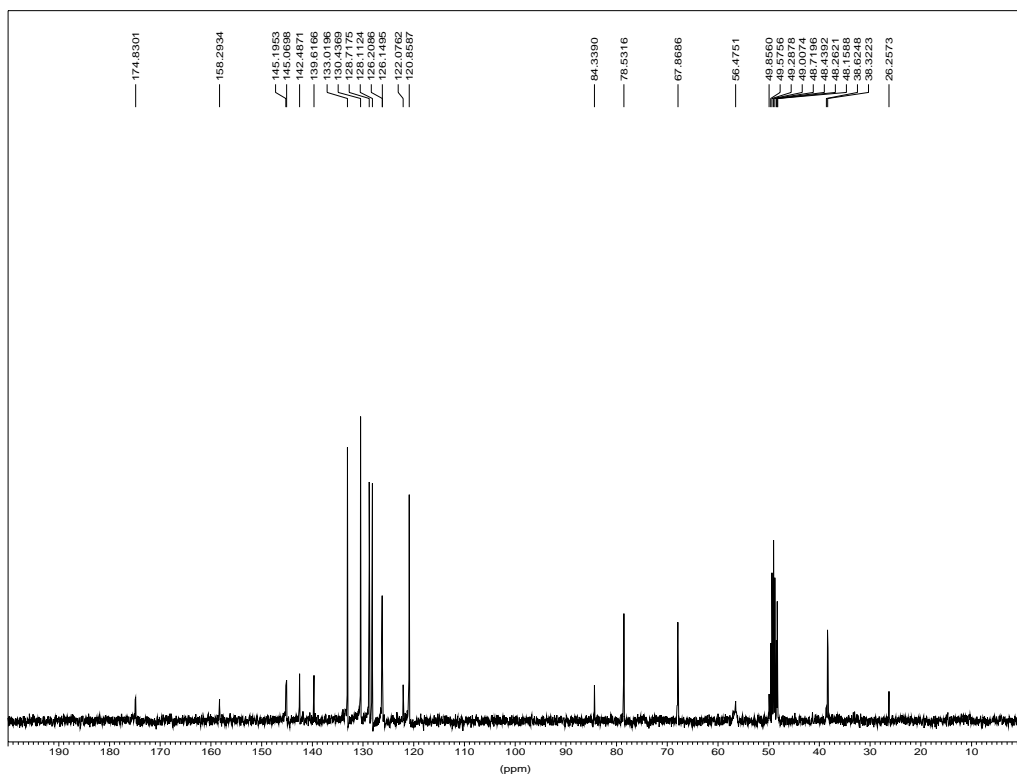

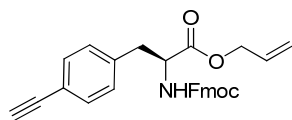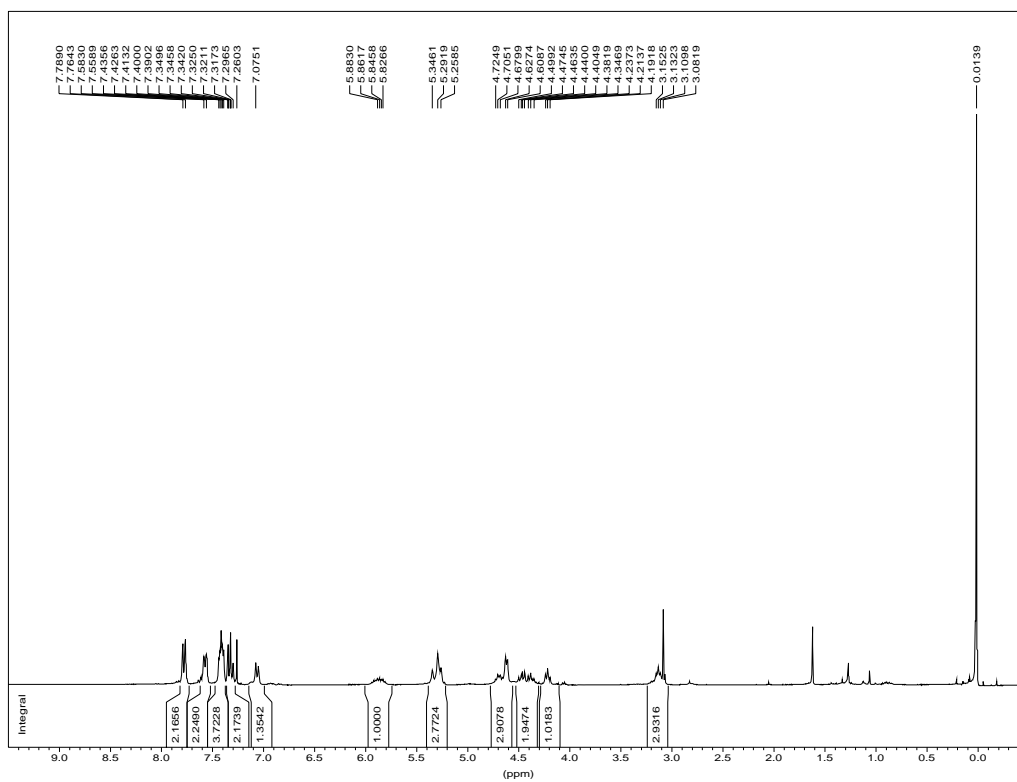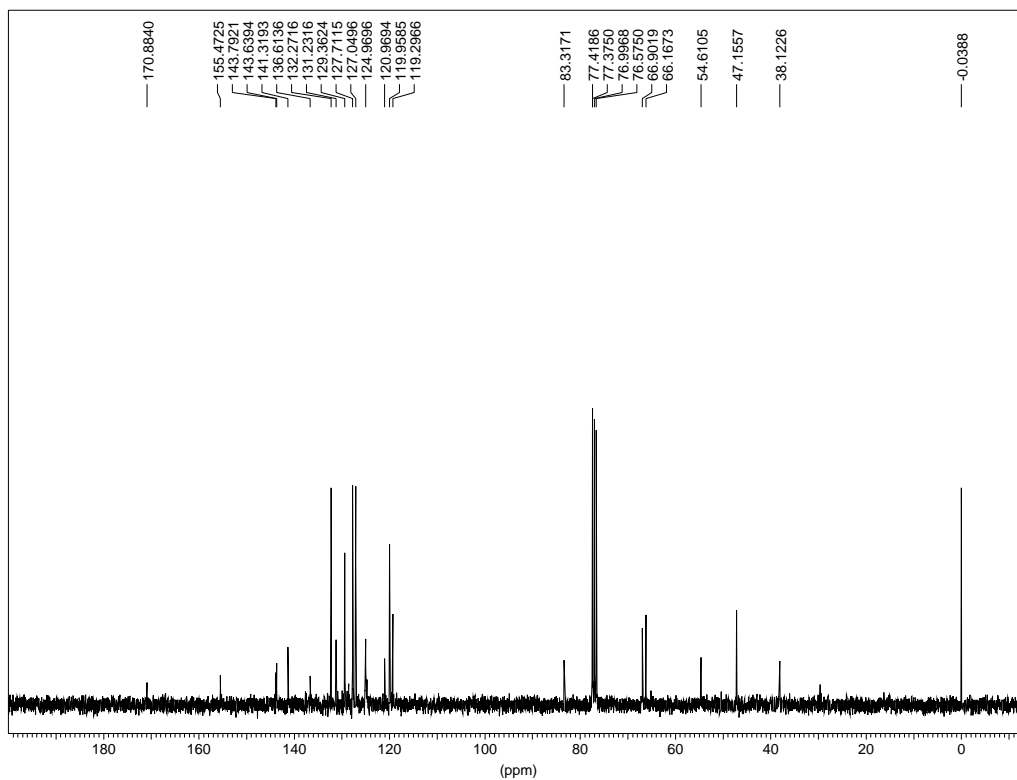

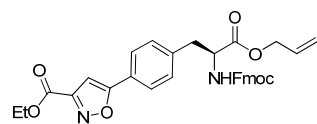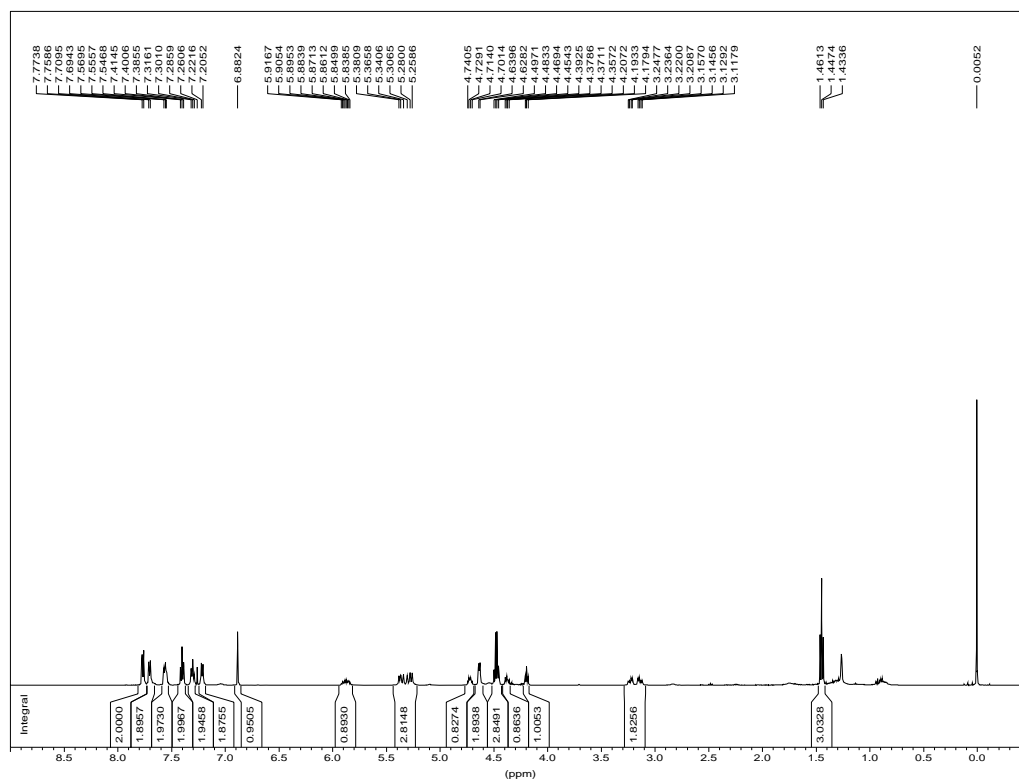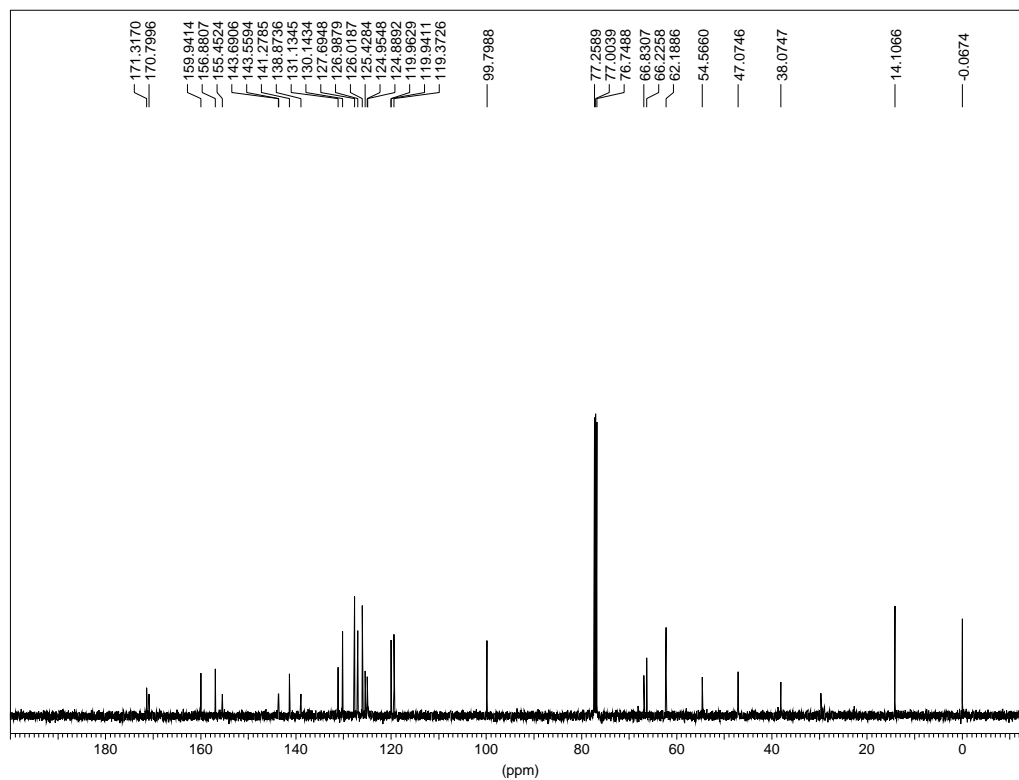

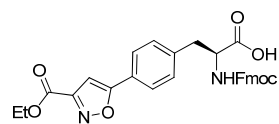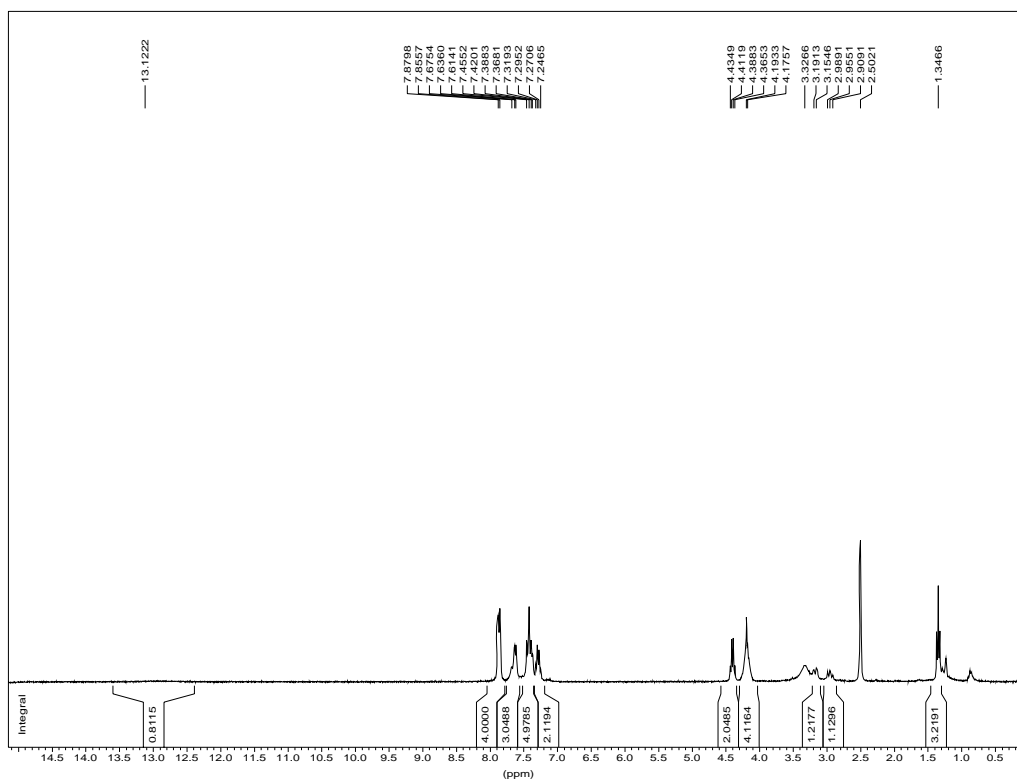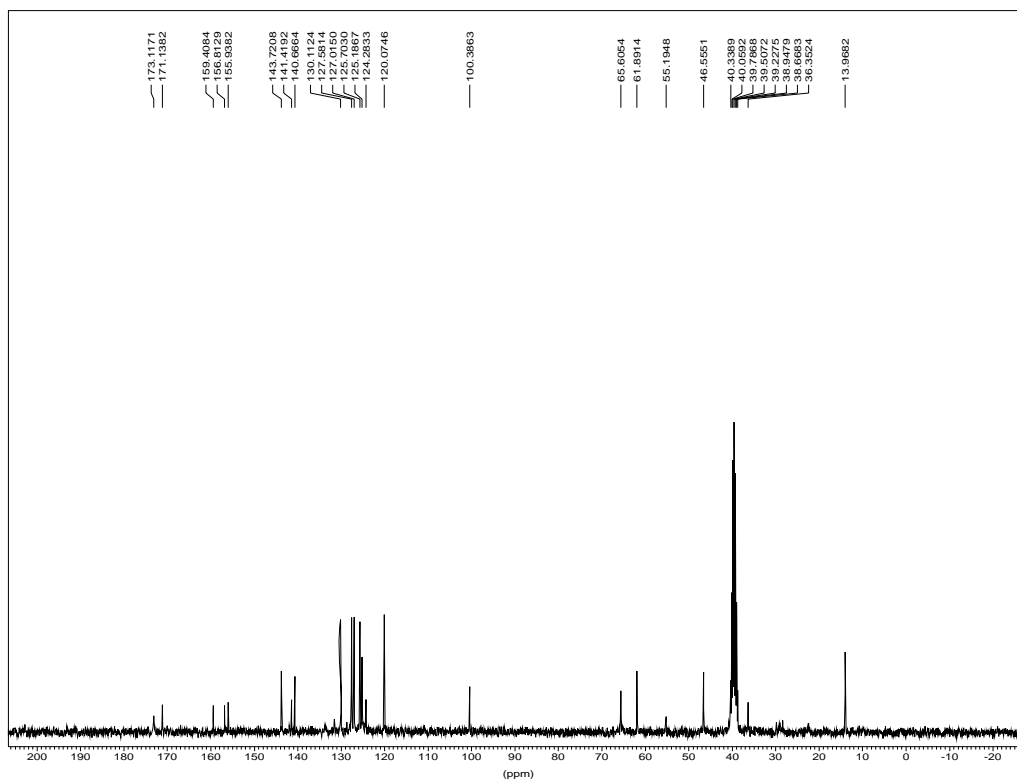

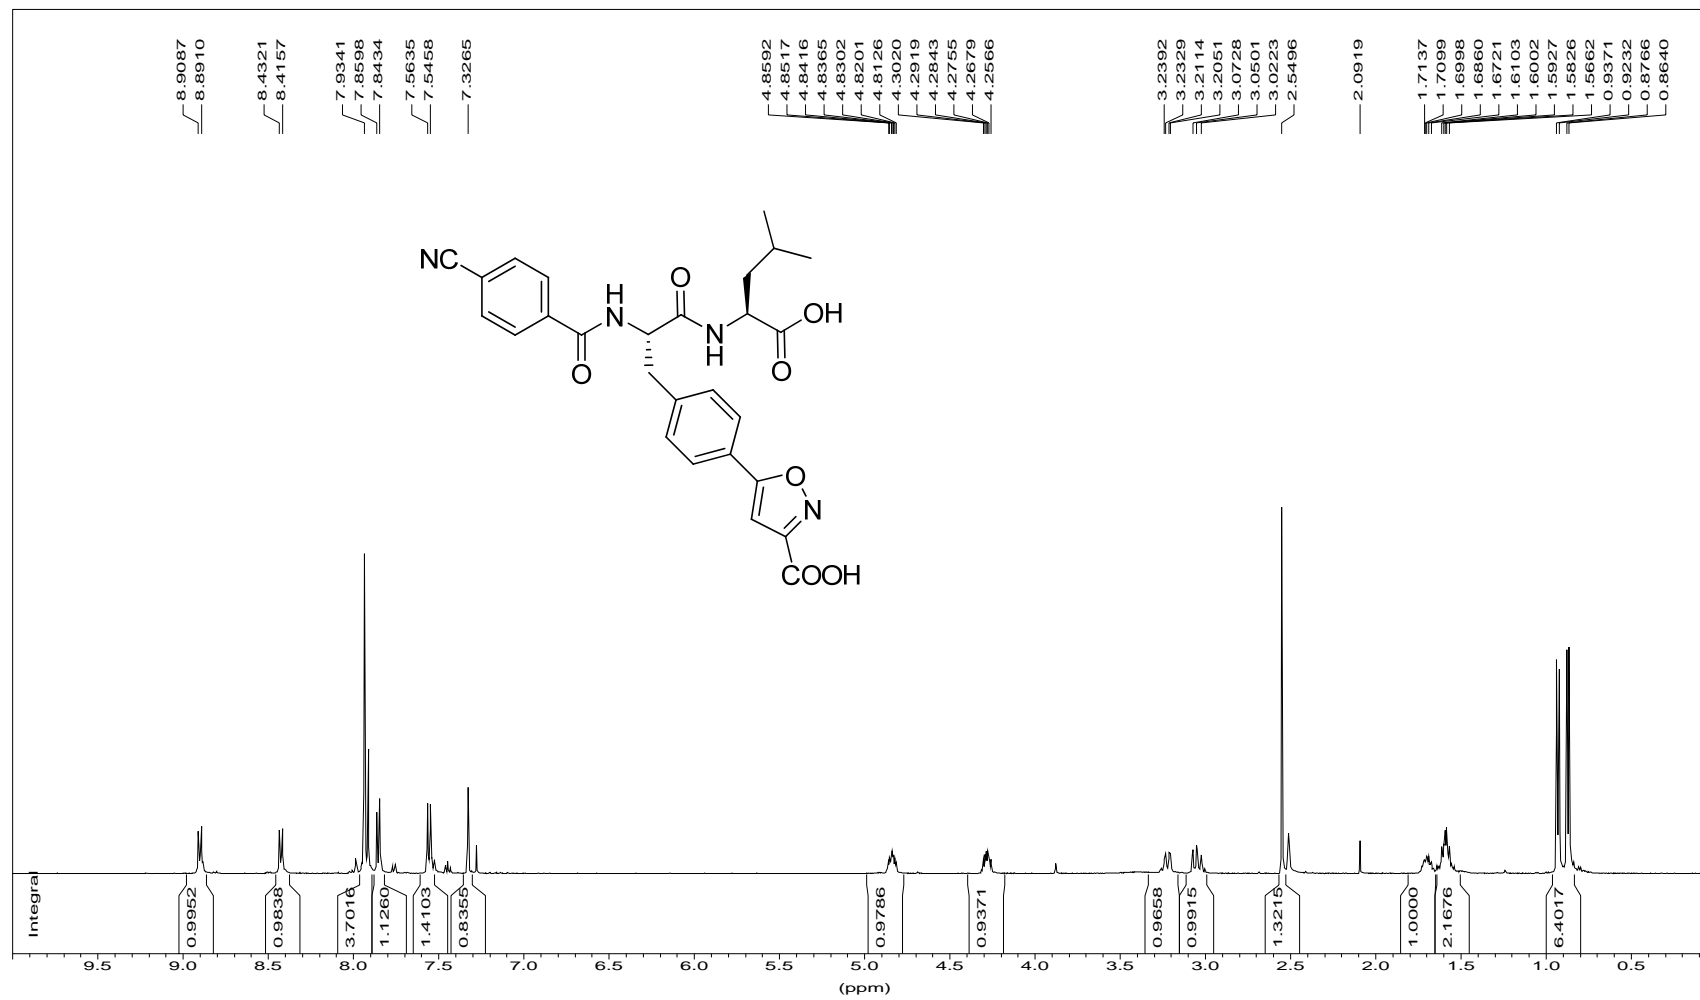

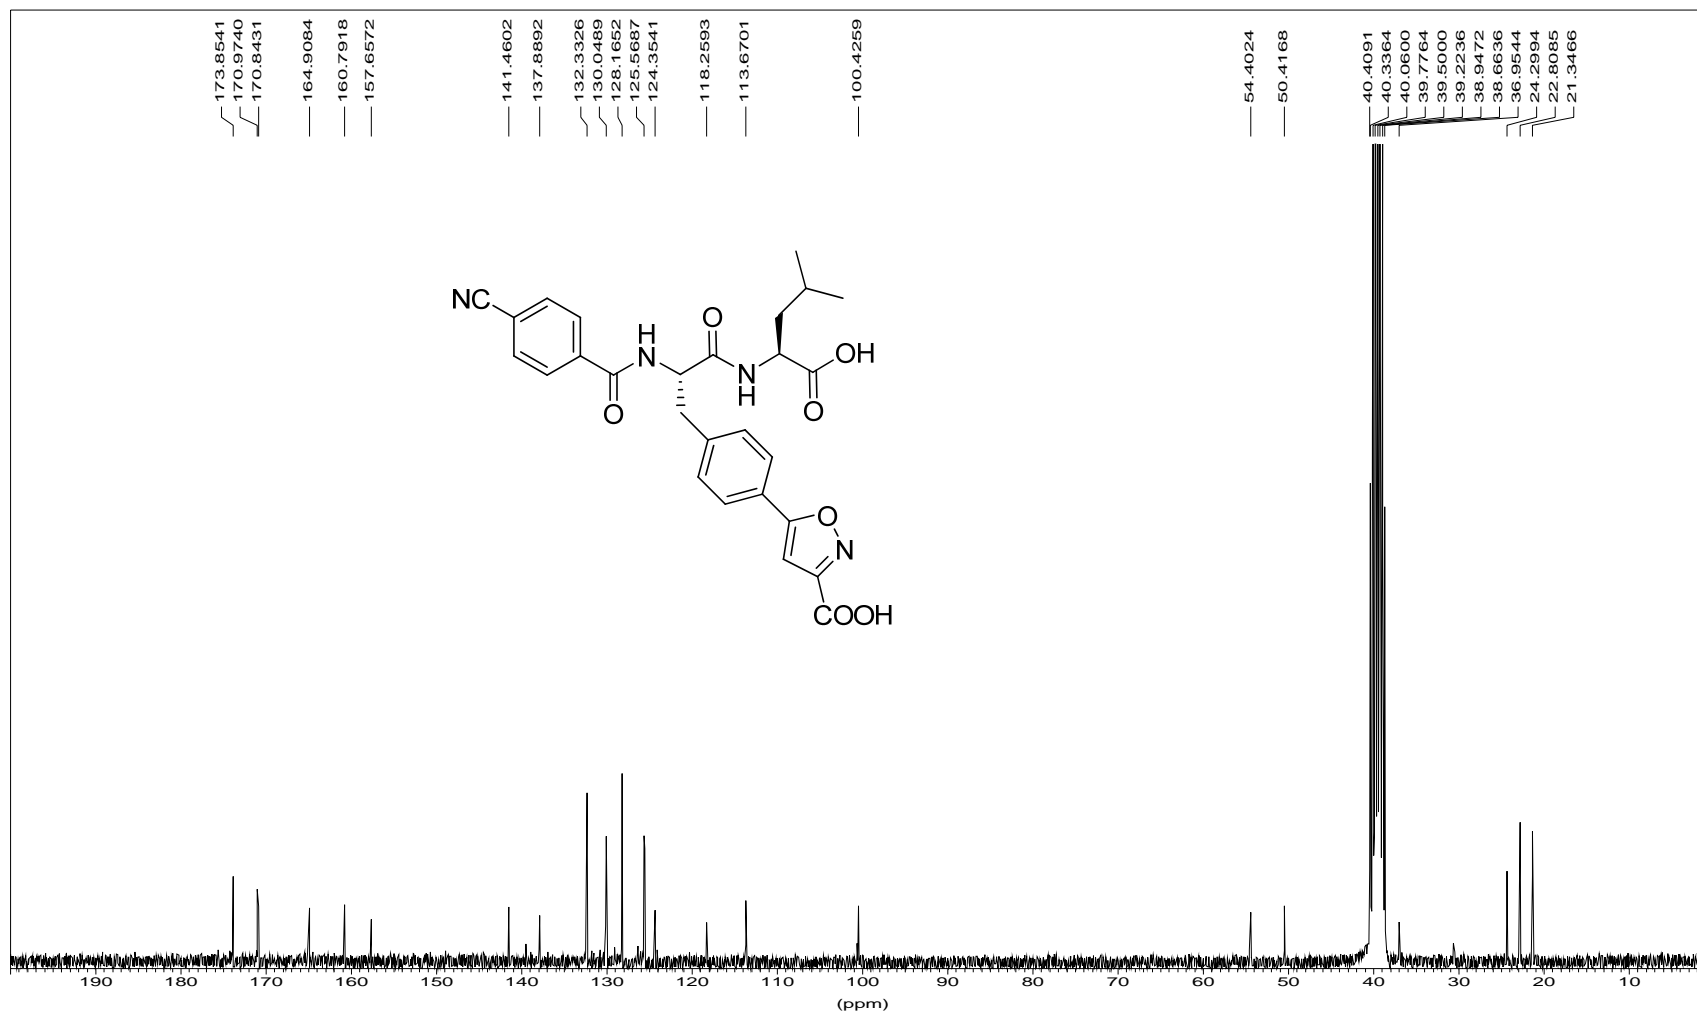

Supplement: c000283f.pdf [file c000283f.pdf]
